# Supplementary material for: Unraveling the Metabolic Changes in Acute Pancreatitis: A Metabolomics-Based Approach for Etiological Differentiation and Acute Biomarker Discovery
Source: MDPI journal article supplement (doi:10.3390/biom13101558), 2023-10-22
Supplement: s1 [file s1]

|                        | P1<br>BAP | P2<br>BAP | P3<br>BAP | P4<br>BAP | P5<br>BAP | P6<br>BAP | P7<br>BAP | P9<br>BAP |
|------------------------|-----------|-----------|-----------|-----------|-----------|-----------|-----------|-----------|
| Phosphoryl             | 4007      | 4084      | 4816      |           |           | 5329      | 4208      | 4644      |
| NI1                    | 6395      | 4178      | 4993      | 8463      | 6132      | 7400      | 9694      | 8860      |
| Spermine               | 5788      | 3693      | 9775      | 5981      | 6729      | 5684      | 6174      |           |
| NI2                    | 8199      | 7514      | 7506      | 9469      |           | 4735      | 4580      |           |
| NI3                    | 8612      | 5907      | 7653      | 10599     | 9604      | 8764      | 9980      | 8566      |
| NI4                    |           | 2183      |           |           |           |           |           |           |
| Tyrosylglyc            | 3797      | 3094      |           | 3297      |           |           |           |           |
| Dihydrobiopterin       |           |           |           | 18246     | 15450     | 15561     | 16514     | 8268      |
| N-acetyl sp            | 8599      | 9367      | 9017      | 12575     | 11520     | 10640     |           | 9937      |
| Sterol                 |           |           |           | 15923     | 14142     | 16593     | 12638     | 7007      |
| b-Neurami              | 8336      | 7755      | 9352      | 7447      | 6567      | 5942      | 9840      | 5565      |
| NI5                    | 3917      | 5931      | 3175      | 6422      | 5260      |           | 2099      | 4546      |
| NI6                    | 13737     | 5820      |           | 12863     | 6750      | 6087      | 11486     | 4674      |
| NI7                    | 4426      | 5828      | 6687      | 7559      | 4725      | 5638      | 4186      |           |
| (S)-3-hydro            | 3218      | 3704      |           | 7376      | 5825      | 7763      | 7015      |           |
| NI8                    | 8362      | 5734      | 6686      | 8846      | 3333      | 6522      |           | 5342      |
| NI9                    | 2029      | 2220      | 1797      | 2559      |           | 1881      | 2284      |           |
| NI10                   |           | 2656      |           | 2317      | 1798      |           | 2418      |           |
| 9-Hexadecenoylcholine  |           | 5068      |           | 6828      | 4938      | 3744      | 4685      | 4062      |
| Prostaglandin E2       |           |           | 6060      |           | 10305     | 2652      | 6471      | 4669      |
| NI11                   | 2471      |           | 2124      |           | 2128      |           | 2681      |           |
| NI12                   | 13693     | 8373      | 11407     | 15837     | 13034     | 12276     | 15245     | 11811     |
| MG(0:0/18:0/0:0)       |           |           |           |           |           |           |           |           |
| LPA(14:0)              | 1939      |           | 2378      | 3475      | 2791      |           | 2708      | 2286      |
| MG(20:0)               | 16803     | 12185     | 15845     | 20835     | 17362     | 17433     | 20673     | 17718     |
| NI13                   |           |           |           | 2259      |           | 2323      | 1903      |           |
| NI14                   | 2386      |           |           |           |           | 1867      | 2549      |           |
| Homolithocholic acid   |           |           |           |           |           |           | 3254      |           |
| NI15                   |           |           | 2261      | 4321      | 2943      | 2960      | 2361      | 2692      |
| NI16                   |           |           |           | 2125      | 2084      |           | 1934      |           |
| NI17                   |           |           | 2723      |           | 4404      |           |           |           |
| Vitamin D2             | 6882      | 5688      | 6277      | 7839      | 7547      |           | 7622      | 7987      |
| 1,25-dihydroxy-3-thiav |           | 3897      | 4209      | 5557      | 5279      | 4463      | 3646      | 3565      |
| NI18                   |           |           | 1642      |           | 1847      | 2317      |           |           |
| 7?,25-dihy             | 15519     | 9805      | 12695     | 17977     | 14626     | 12444     | 16549     | 12738     |
| NI19                   |           |           |           | 3569      | 3233      |           |           |           |
| C18:1 glycerol-3-phos  |           | 3783      |           |           | 1739      | 9754      | 2124      |           |
| N-stearoyl phenylalani |           | 4480      | 2831      |           | 3260      |           | 3351      | 3963      |
| LPE(P-16:0,            | 3488      | 4674      |           | 3734      | 3426      |           |           | 4286      |
| Ascorbyl st            | 257180    | 224253    | 276991    | 329628    | 327396    | 314048    | 338824    | 7163      |
| Lauryl stea            | 3873      |           |           | 4235      | 2896      | 3336      | 3822      |           |
| NI20                   |           |           |           |           |           |           |           |           |
| Arachidyl c            | 2002      |           | 1727      | 1851      | 2427      | 2168      | 2363      | 2055      |
| LPA(20:5)              |           |           |           | 26408     | 6211      | 22261     | 22552     | 10219     |
| NI21                   | 7780      |           | 6255      | 8379      | 10554     | 9245      | 7365      | 6476      |

|                                  |        |       |        |        |        |        |        |        |
|----------------------------------|--------|-------|--------|--------|--------|--------|--------|--------|
| NI22                             |        | 8941  | 5547   | 7903   | 8621   | 8874   | 7605   | 8525   |
| NI23                             |        |       |        | 2021   |        |        |        | 2033   |
| Myristyl lin                     | 151180 | 12204 | 155629 | 171164 | 16962  | 146253 | 177405 | 163927 |
| LPC(O-16:0                       | 3791   | 5210  | 5908   | 7018   | 6470   | 5043   | 3829   | 3402   |
| 1a,25-Dihydroxypentyl            |        | 3691  | 2952   | 5548   | 3872   | 3418   |        |        |
| NI24                             | 4400   | 4088  | 4898   | 5252   | 5336   | 5145   | 5305   | 5078   |
| 1a,25-dihydroxy-11a-phenylchole  |        |       | 9794   | 10916  | 9357   | 8359   | 9391   | 9828   |
| LPC(16:1)                        | 4662   | 3431  |        | 8765   | 9878   | 10759  | 9411   | 3908   |
| NI25                             | 18912  | 43376 | 49494  | 73504  | 102954 | 119807 | 72163  | 86369  |
| LPE(20:4)                        | 9861   | 9935  | 3066   | 9836   | 8227   | 5695   | 8122   | 9919   |
| NI26                             |        | 2606  |        | 3586   |        |        |        | 3156   |
| NI27                             | 6791   | 7564  |        | 7094   | 5626   | 3965   | 5314   | 8236   |
| LPG(18:0)                        |        |       |        | 11874  |        | 11080  | 6203   |        |
| NI28                             |        | 3977  | 3145   | 6210   | 3713   | 5150   | 4682   | 4582   |
| NI29                             | 3071   |       |        | 3501   |        |        |        |        |
| LPC 18:3                         | 1635   | 6164  |        | 9130   | 12127  | 12289  | 8540   | 10763  |
| LPC 18:2                         | 67763  | 36140 | 11463  | 32713  | 29258  | 33679  | 4960   | 20644  |
| NI30                             | 11346  | 13312 | 13663  | 15027  | 18964  | 19431  | 23369  | 12229  |
| NI31                             |        | 12767 | 12535  | 15765  | 13316  |        | 10966  | 12328  |
| Cer(d18:0/                       | 8038   | 7719  | 6607   | 5167   | 7285   | 8621   | 6731   | 6223   |
| Stearyl lino                     | 4048   | 3500  | 2824   | 3027   | 3200   | 4647   | 3527   | 2941   |
| Stearyl ste:                     | 2669   | 3342  | 3050   | 4400   |        | 3978   | 4034   | 4101   |
| PG(20:1/0:                       | 3048   |       | 3359   | 3896   | 3389   | 3752   | 3777   | 3404   |
| LPC(20:5)                        | 8500   | 5293  |        | 3252   |        | 3636   |        | 3152   |
| LPC (20:4)                       | 29421  | 23588 | 19381  | 34800  | 21370  | 19390  | 4565   | 7276   |
| LPC(20:3)                        | 3569   | 3426  | 3742   | 5494   |        | 5411   | 3973   | 3189   |
| LPC(18:0/0:0) [M+Na]             |        | 8489  | 11774  | 14321  | 14669  | 13545  | 11207  | 8301   |
| NI32                             | 2257   |       |        | 2780   | 3013   | 2637   | 2373   | 2547   |
| all-trans Retinyl oleate         |        | 4371  | 5541   | 8455   | 6465   | 6861   | 6015   | 4024   |
| NI33                             | 8364   | 7058  | 7551   | 9897   | 8689   |        | 9592   | 8734   |
| NI34                             | 1487   | 1749  |        | 2457   |        |        | 2604   | 1653   |
| PC(18:0/2:1                      | 3846   | 2403  |        | 3928   |        |        |        | 1415   |
| NI35                             | 8652   | 8152  | 9438   | 12413  | 10381  | 13486  | 12309  | 11512  |
| NI36                             |        | 4382  | 4724   | 5410   | 5413   | 2810   | 2805   | 5124   |
| DG(16:1/0:                       | 5053   | 4827  | 7321   | 10831  |        | 7338   | 5135   | 5807   |
| DG(13:0/20:4(5Z,8Z,11Z,14Z)/0:0) |        |       | 3573   | 4675   | 3994   | 3773   |        | 2773   |
| PA(O-16:0/                       | 2478   | 2441  |        |        |        | 4589   | 2568   |        |
| NI37                             |        | 2994  | 2029   | 3302   |        |        | 3052   |        |
| NI38                             |        |       | 1088   |        |        | 2257   | 1814   |        |
| NI39                             | 7691   | 8161  | 8277   | 9697   | 9166   | 10513  | 7945   | 7154   |
| LPI(18:3/0:0)                    |        | 3612  |        | 4282   |        | 5150   | 3929   | 4162   |
| DG(18:1/1(                       | 3817   | 3860  | 3331   | 4199   |        | 4675   | 3541   | 3338   |
| LPC(24:1)                        | 1241   | 1490  |        | 1674   |        | 1423   | 1665   |        |
| PG(12:0/12:0)                    |        |       | 3464   | 5205   | 4119   | 4772   | 5051   | 4654   |
| Cer(t18:0/1                      | 5903   | 7214  | 5147   | 6296   | 5160   | 6300   | 6284   | 6183   |
| NI40                             | 2520   |       | 2682   | 3851   | 2866   | 3360   | 2389   | 2411   |
| DG(36:4)                         | 9767   | 8402  | 8364   | 11257  | 10412  | 12143  | 11323  | 11549  |

|                 |        |        |        |        |        |        |        |        |
|-----------------|--------|--------|--------|--------|--------|--------|--------|--------|
| NI41            | 3133   | 3920   |        | 3197   |        | 2092   | 3227   |        |
| DG(37:6)        | 2520   | 3063   | 2460   | 3896   | 2705   | 3470   | 2909   | 2652   |
| LPC(26:1)       | 4019   | 4450   | 3709   | 3582   |        | 4728   | 3863   | 3799   |
| NI42            | 1535   |        |        | 2049   |        |        |        |        |
| NI43            | 1267   |        |        | 2807   |        | 2731   | 2273   |        |
| NI44            |        | 2828   |        |        | 3135   |        | 3181   | 3074   |
| Cholestero      | 6622   | 6581   | 7324   | 10506  | 8839   | 10437  | 8956   | 10421  |
| PC(26:0)        |        |        |        |        |        | 1073   |        |        |
| PE(30:3)        | 3576   | 3440   | 2880   | 5742   | 5538   | 5173   | 3382   |        |
| DG(40:7)        | 2355   | 2299   |        | 3220   | 2917   | 3027   | 1482   |        |
| DG(40:9)        |        | 7741   | 6679   | 9169   | 7859   | 7881   | 7987   | 8620   |
| NI45            |        |        | 1519   |        |        |        | 2310   |        |
| 20:1 Chole:     | 117408 | 123667 | 117889 | 185222 | 166876 | 182710 | 159160 | 136582 |
| NI46            |        |        |        | 1390   | 1635   | 1631   |        | 1756   |
| NI47            |        |        | 1517   | 1750   |        |        | 2171   | 1546   |
| NI48            | 131820 | 15401  | 127585 | 202563 | 17589  | 17421  | 18068  | 7913   |
| PG(32:3)        | 3983   | 4553   | 4106   | 6565   | 5328   | 6614   | 4813   | 4529   |
| PC(P-18:0/16:0) |        |        |        | 2016   | 1855   | 2372   | 1887   |        |
| NI49            | 1222   | 1550   | 1641   | 2129   |        | 1753   |        | 1587   |
| PG(O-18:0/      | 1536   |        | 1458   | 1752   |        | 1550   | 1609   |        |
| PG(38:7)        |        |        |        | 2281   | 1892   |        | 1609   |        |
| PC(P-18:0/      | 1431   | 1702   |        | 2190   | 1808   | 2046   |        | 1481   |
| NI50            |        |        |        | 1840   | 1538   | 1444   | 1126   |        |
| PI(16:0/16:     | 2958   | 3504   | 3454   | 5021   | 4134   | 4555   | 3975   | 4193   |
| TG (49:3)       | 1573   | 1780   |        |        |        | 1955   | 1748   | 1729   |
| NI51            |        |        |        | 1472   |        | 1298   | 1099   |        |
| NI52            | 1081   |        |        |        | 1186   | 1481   |        | 1139   |
| TG(57:3)        | 2951   | 3078   | 2796   | 4755   | 4586   | 5217   | 3700   | 4357   |

| P10<br>BAP | P11<br>BAP | P12<br>BAP | P14<br>BAP | P17<br>BAP | P19<br>BAP | P20<br>BAP | P22<br>BAP | P23<br>BAP |
|------------|------------|------------|------------|------------|------------|------------|------------|------------|
|            | 2851       |            | 4586       | 4173       |            | 3378       | 2944       |            |
| 8237       | 8400       | 7361       | 8779       | 4821       | 6748       | 6263       | 5471       | 4152       |
| 11097      | 8695       |            | 6559       | 2984       |            |            | 5403       |            |
| 6010       | 5021       | 3126       | 5834       | 10640      | 2742       | 4474       |            | 6187       |
| 10781      | 10043      | 9518       | 10696      | 7438       | 5669       | 6410       | 7999       | 5647       |
|            | 2867       | 2382       | 3218       |            |            |            | 2225       |            |
| 7374       | 6718       |            | 10167      |            |            |            | 3959       |            |
| 21814      | 9479       |            | 5737       | 3982       | 3068       |            | 13724      | 5477       |
| 11882      | 11941      | 8971       | 12530      | 9892       | 6369       | 8710       |            | 7316       |
| 14160      | 2241       | 5830       | 10013      | 6693       |            | 5667       |            |            |
| 6579       | 8951       | 12628      | 15567      | 14580      | 2865       | 6120       | 4724       | 4604       |
| 6274       | 4272       | 4589       | 5326       |            | 3196       |            |            |            |
|            | 10378      | 13052      | 14128      | 7315       |            |            | 13391      | 14318      |
| 6814       | 5545       | 4491       | 5354       |            | 3820       | 3152       | 2650       |            |
| 3223       |            | 4569       |            | 4437       | 3824       |            |            |            |
| 6297       | 3128       |            | 8991       |            | 6316       | 4485       | 6726       | 6886       |
|            | 2477       |            |            |            |            |            | 1545       |            |
| 1205       | 2066       |            |            |            |            |            | 1528       |            |
| 3882       | 4464       |            | 3244       | 2874       |            |            | 3710       |            |
| 3933       |            | 5564       | 7790       |            | 4355       | 4675       |            |            |
|            | 2695       |            |            |            |            |            |            |            |
| 15683      | 12440      | 13231      | 15613      | 10025      | 8573       | 9346       | 10293      | 9675       |
| 5350       |            |            |            |            |            |            | 2235       |            |
| 3014       | 2727       |            | 2594       | 2121       |            |            |            |            |
| 23071      | 23866      | 18193      | 24911      | 15241      | 9913       | 12117      | 17096      | 11977      |
| 2201       | 2540       |            | 2624       |            | 1743       |            |            |            |
| 2232       | 2711       | 2131       | 2670       | 3089       |            | 280        |            |            |
| 5208       |            |            |            |            |            |            |            |            |
| 2936       | 3475       |            | 3316       |            |            |            |            |            |
| 2383       | 2330       |            | 2911       | 1939       |            |            | 1643       |            |
|            | 3951       | 2595       | 4149       |            |            |            | 1727       | 1602       |
| 8252       | 8172       | 7449       | 8648       | 6732       | 6097       | 5169       | 6468       |            |
| 4259       | 6695       | 4609       | 6174       |            | 3660       | 3480       | 2549       | 3703       |
| 1947       |            | 1933       |            |            |            |            |            |            |
| 16154      | 17215      | 14630      | 16077      | 11683      | 9462       | 9077       | 14284      | 11241      |
| 3116       | 4089       | 2830       | 4256       | 2625       | 3017       |            | 2511       |            |
| 4632       |            |            | 1441       |            |            |            |            |            |
| 4262       | 4071       | 2852       | 3765       | 3582       |            |            |            |            |
| 4390       | 3679       | 3210       | 5170       | 3747       | 2842       | 2981       | 2670       |            |
| 353203     | 366664     | 252554     | 404480     | 282241     | 173023     | 141291     | 277487     | 184068     |
| 3843       | 4957       |            | 3566       | 3367       |            |            |            |            |
|            |            | 5090       |            |            |            | 5290       |            |            |
|            | 2693       |            |            | 2173       |            |            |            |            |
| 33426      | 14973      | 6397       | 7194       | 5370       | 4394       |            | 22202      | 7556       |
| 5460       | 5947       | 5672       | 8515       | 8243       | 5611       | 4343       | 6948       |            |

|        |       |        |       |       |        |       |       |        |
|--------|-------|--------|-------|-------|--------|-------|-------|--------|
| 7105   | 9525  | 5593   | 10566 | 7865  |        |       | 7523  | 6535   |
| 1937   | 2709  | 1385   |       |       |        |       |       |        |
| 169639 | 15658 | 119205 | 26373 | 13631 | 101752 | 72446 | 9940  | 102685 |
| 5299   | 3407  | 3649   | 4691  | 4306  | 4080   |       | 4133  |        |
| 3749   | 3695  | 2516   | 4534  | 3399  | 2738   | 2208  | 3392  |        |
| 6306   | 6227  | 3886   | 6638  | 5272  | 3388   |       | 4094  | 3367   |
| 9150   | 9282  | 8746   | 7638  | 8570  | 7230   |       | 8822  |        |
| 2808   | 3045  | 6210   | 1595  | 6798  | 5851   | 6315  | 3657  | 4200   |
| 61296  | 53462 | 49238  | 66071 | 48642 | 16203  | 34507 | 22041 | 8839   |
| 14506  | 9036  | 7423   | 10182 | 12647 | 4714   |       | 2896  | 5365   |
| 4543   | 4122  | 2056   |       |       |        |       |       |        |
| 10078  | 9303  | 6563   | 8414  | 9930  |        | 4780  | 8419  |        |
| 9741   |       |        |       |       |        |       | 1393  | 885    |
|        | 5656  | 4351   | 6482  | 4156  | 3236   | 2302  | 3590  |        |
|        | 3118  |        | 2924  | 3327  |        |       |       |        |
| 7561   | 5942  | 5331   | 8024  | 5687  |        | 3500  | 1735  |        |
| 26755  | 10098 | 5315   | 30472 | 36438 | 18257  |       | 40532 |        |
| 21012  | 16200 | 11510  | 11072 | 9550  | 7546   | 13385 | 6083  | 4989   |
| 17320  | 18182 | 11957  | 17117 |       | 12778  |       | 7721  |        |
| 7378   |       | 5822   | 9250  | 6090  |        | 4712  | 4769  | 3688   |
|        | 4911  |        | 4418  | 3697  |        |       |       | 2290   |
| 5235   | 5002  | 3375   | 5139  | 4066  | 2355   |       | 3594  |        |
| 4193   | 4759  |        | 4932  | 3504  |        |       | 3055  |        |
| 4043   | 2094  |        | 3257  | 3693  |        |       | 4227  |        |
| 7247   | 29832 | 16681  | 35505 | 30492 | 23326  | 9995  | 23539 | 5505   |
| 5509   | 4634  | 3967   |       | 3499  | 2485   |       | 2314  | 3171   |
| 13587  | 15146 | 12160  | 17666 | 9584  | 8548   | 9943  | 8980  |        |
| 2971   | 3107  | 2164   | 2579  |       |        |       | 1711  |        |
| 8082   | 9086  | 6297   | 8488  | 6285  | 5493   | 3963  | 4350  |        |
| 11352  | 9271  | 8768   | 10476 | 7981  | 7124   | 6920  | 7659  | 6637   |
| 2729   | 2633  |        | 2673  | 2253  |        |       |       |        |
|        |       |        |       | 3898  |        |       | 3250  |        |
| 16536  | 14771 | 10604  | 17257 | 10839 | 7746   | 7511  | 11471 | 6385   |
| 6598   | 5786  |        | 5111  |       | 3553   | 4169  | 2420  | 5259   |
| 7393   | 3375  | 4928   | 7113  | 5505  | 4969   | 4880  | 5491  |        |
| 3540   | 3501  |        | 4738  | 3312  |        | 2605  | 2854  |        |
| 6889   | 3913  | 5299   | 7725  | 3804  |        |       |       |        |
| 2418   |       |        |       | 2886  |        |       | 1685  |        |
|        | 2900  |        | 3034  |       |        |       |       |        |
| 7493   | 6851  | 7662   | 11536 | 3928  | 7133   | 5119  | 3120  | 5142   |
|        | 4668  | 3758   | 4826  | 4296  |        |       | 1819  | 1813   |
| 3172   | 4703  | 3143   | 5931  |       | 3244   |       |       |        |
| 1971   | 1969  |        | 2254  |       | 1125   |       |       | 1076   |
| 5362   | 5774  | 3626   |       | 3641  | 2920   |       | 3207  |        |
| 7506   | 7709  | 5532   | 9454  | 4865  | 4880   |       | 4459  | 3669   |
| 3390   | 3096  | 2427   | 3624  | 2166  | 3672   | 2208  | 2716  | 2583   |
| 11919  | 11786 | 9609   | 12662 | 10213 | 8073   | 6355  | 8702  |        |

|        |        |        |       |        |        |       |        |       |
|--------|--------|--------|-------|--------|--------|-------|--------|-------|
|        | 4270   | 3414   | 4651  |        | 2185   |       | 1048   |       |
| 4281   | 4001   | 3529   | 4948  | 2608   | 2122   |       | 2177   |       |
|        | 2554   |        | 3400  |        | 3701   |       | 3217   | 3535  |
|        | 2161   |        |       | 1819   |        |       |        |       |
| 2314   | 2556   |        | 3290  | 1688   | 1411   | 1527  |        | 2070  |
| 4132   | 3548   |        | 4842  |        |        |       | 2342   |       |
| 12087  | 10059  | 8560   | 13486 | 9417   | 6047   | 6256  | 704    | 4631  |
| 1629   |        |        |       |        |        |       |        |       |
| 4255   | 3305   |        | 4071  | 3672   |        | 2099  | 3942   |       |
| 3226   |        |        | 3343  |        |        |       | 1923   |       |
| 10117  | 11318  | 7385   | 10336 | 8336   | 4592   |       | 7179   |       |
|        |        | 1952   |       |        |        |       |        |       |
| 205613 | 212744 | 117305 | 4890  | 142717 | 98641  | 74639 | 121228 | 84145 |
|        | 1329   |        | 1896  |        |        |       |        |       |
| 2003   | 1873   |        |       | 1694   |        |       |        |       |
| 22008  | 13247  | 125447 | 17294 | 144398 | 109159 | 81483 | 11901  | 85310 |
| 6866   | 6888   | 3884   | 6719  | 4131   | 3847   | 2131  | 4535   | 2640  |
|        | 1678   |        | 2438  |        |        |       |        |       |
| 1792   | 2142   |        | 1622  | 1390   | 1196   |       | 1519   |       |
| 1642   | 1896   |        |       |        | 1437   |       | 1473   |       |
| 2575   | 3015   |        | 3288  | 2051   |        |       |        |       |
| 1890   |        |        | 2736  |        |        |       | 1471   |       |
|        | 1911   |        | 2340  |        |        |       | 1126   |       |
| 5125   | 5477   | 3551   | 5959  | 4688   |        | 3224  | 3532   | 1969  |
| 2290   | 2283   |        | 2211  |        |        |       | 1636   |       |
| 2205   | 2220   |        | 2405  | 1192   |        |       | 880    |       |
| 1501   | 1697   | 1132   | 1778  | 1441   |        |       |        |       |
| 5040   | 6604   | 2752   | 6778  | 4419   | 2917   | 2335  | 3671   | 1762  |

| P25<br>BAP | P29<br>BAP | P30<br>BAP | P33<br>BAP | P34<br>BAP | P8<br>AAP | P15<br>AAP | P18<br>AAP | P21<br>AAP |
|------------|------------|------------|------------|------------|-----------|------------|------------|------------|
|            |            |            |            |            | 5009      | 3115       |            |            |
| 5628       | 4656       |            |            | 4122       | 10765     | 7560       | 4290       | 4753       |
| 10716      | 4392       |            |            |            | 6291      | 6960       | 8418       |            |
| 5286       |            |            |            | 3450       | 4321      | 5178       | 3896       | 8826       |
| 5550       | 3509       | 2261       | 3192       | 4686       | 10964     | 10263      | 6207       | 6422       |
|            |            |            |            |            | 3481      |            |            |            |
|            |            |            |            |            |           | 12126      |            | 4701       |
|            | 7520       | 6616       | 5441       | 7757       | 13925     | 8934       |            | 3322       |
| 8438       |            |            |            |            | 9868      | 11929      | 7841       | 8165       |
|            | 13684      | 9439       |            | 7145       | 29098     | 8658       |            | 6552       |
|            |            |            |            |            | 3380      | 16571      | 4165       | 7281       |
| 5776       |            | 4582       |            | 4939       | 5092      |            | 1739       | 5815       |
| 12676      | 1586       | 11960      |            | 10415      | 10679     | 15268      | 11053      | 4629       |
| 4354       |            | 4721       |            | 3962       | 4804      | 2668       | 3623       | 4907       |
|            |            |            |            | 3018       | 4097      | 5387       | 3511       | 4134       |
| 4377       |            |            |            |            | 9177      | 9090       | 5248       | 7070       |
|            |            |            |            |            |           | 1377       |            |            |
|            |            |            |            |            |           |            | 1260       |            |
|            |            |            |            |            | 3771      | 3579       | 3314       | 3344       |
| 2480       |            | 4638       |            | 4843       | 8494      | 6912       |            | 4635       |
|            |            |            |            |            |           |            |            |            |
| 9405       | 7659       | 5708       | 6215       | 9008       | 15563     | 15412      | 9382       | 8832       |
| 5924       | 2146       |            |            |            |           |            | 4610       | 2244       |
|            |            |            |            |            |           | 2273       |            |            |
| 11131      | 6866       | 3897       | 6686       | 6878       | 19835     | 24529      | 12894      | 12238      |
|            |            |            |            |            |           |            | 2280       |            |
| 1146       |            |            |            |            |           | 2808       |            |            |
| 8245       |            |            | 6360       |            |           |            | 12283      | 8379       |
|            |            |            |            |            | 3424      | 2407       | 2359       |            |
|            |            |            |            |            | 2118      |            | 1222       |            |
|            |            |            |            |            |           |            | 3154       | 3413       |
|            | 2568       |            |            |            | 7851      | 8633       | 5106       | 6133       |
|            |            |            |            |            | 2825      | 4493       |            |            |
|            |            |            |            |            |           |            |            |            |
| 10915      | 7471       | 8362       | 6432       | 9108       | 15907     | 17040      | 10247      | 9845       |
|            |            |            |            |            | 2261      | 3579       |            |            |
|            |            | 5209       | 3439       |            |           | 3418       |            |            |
|            |            |            |            |            | 4424      |            | 3322       |            |
|            |            |            |            |            | 4259      | 4422       | 3485       | 3296       |
| 169105     | 118758     | 109103     | 108442     | 149648     | 329313    | 329767     | 213105     | 192640     |
| 4090       | 5589       |            | 4090       | 4657       |           |            |            | 3500       |
|            |            |            |            |            |           |            |            |            |
|            |            |            |            |            |           | 2386       |            |            |
|            | 11469      | 9682       | 7386       | 9571       | 19076     | 13944      |            | 4427       |
| 5819       |            |            |            |            | 9271      | 10518      | 9037       | 4095       |

|       |       |       |       |       |        |       |       |       |
|-------|-------|-------|-------|-------|--------|-------|-------|-------|
| 5514  |       | 3862  |       | 3721  | 8414   | 10309 | 8858  | 3581  |
| 3089  | 3390  |       | 3879  |       |        | 1476  | 1645  | 2890  |
| 94257 | 66924 | 71074 | 67719 | 88742 | 187517 | 19538 | 14170 | 10664 |
| 3059  |       |       |       | 3008  |        | 8403  | 3391  | 3996  |
|       |       |       |       |       |        | 4961  | 2958  |       |
| 2671  | 2047  |       | 2336  | 3159  | 5742   | 5893  | 4036  | 4395  |
|       |       |       |       |       | 8772   | 6264  |       | 2282  |
|       | 7163  | 6502  | 2417  | 5728  | 3649   | 8266  | 3447  | 5829  |
| 54529 | 18057 |       | 13755 | 41741 | 95532  | 47371 | 5370  | 52731 |
| 8517  |       |       |       |       | 8960   | 10370 | 7261  | 8349  |
|       |       |       |       |       | 2539   | 3965  |       |       |
|       |       | 2809  | 3609  | 5046  | 6914   | 12329 |       | 8000  |
|       | 10318 | 6518  |       |       | 23502  | 4118  |       |       |
| 2240  |       |       |       |       | 4938   | 6438  | 2846  | 2313  |
|       |       |       |       |       |        | 4515  |       |       |
| 5320  |       |       |       | 4053  | 11691  | 6610  | 1259  | 5423  |
| 20325 |       |       | 4440  | 14629 | 17470  | 38905 | 22993 | 40125 |
| 6816  |       | 9661  |       | 4488  | 15095  | 12939 | 4999  | 7396  |
|       |       | 4506  |       | 4504  | 12557  | 16535 | 9810  | 10377 |
|       |       | 3734  |       |       | 7151   | 7174  | 4806  |       |
|       |       |       |       |       | 3304   | 3791  |       |       |
| 1627  | 1398  |       |       |       | 4446   | 5133  | 2580  |       |
| 2380  |       |       |       | 1968  | 3971   | 5280  |       | 2291  |
|       |       |       |       |       |        | 3940  |       | 4813  |
| 14063 | 9691  | 6626  |       | 9890  | 7559   | 41320 | 21828 | 5511  |
| 2458  |       | 5003  |       | 1843  | 4163   | 5419  | 6995  | 2941  |
|       |       | 6068  |       |       | 11110  | 9371  | 4881  | 9550  |
| 1310  |       | 3618  |       |       | 2411   | 3371  | 2125  | 1844  |
|       | 2555  | 3140  |       |       | 6364   | 8767  | 2601  | 5152  |
| 6566  | 3913  |       |       |       | 9480   | 11162 | 7336  | 7321  |
|       |       |       |       |       |        |       | 1488  |       |
|       |       |       |       |       |        | 4664  | 2614  |       |
| 6522  | 3162  | 2415  |       | 3768  | 11088  | 19748 | 9126  | 7911  |
|       |       |       |       | 3229  | 4444   | 5613  | 2854  |       |
| 3706  |       |       |       | 3049  | 5625   | 8531  | 5522  | 4869  |
|       |       |       |       |       | 2801   | 5212  |       | 3119  |
|       |       |       |       |       | 3878   | 5218  |       |       |
|       |       |       |       |       |        | 2760  |       |       |
|       |       |       |       |       |        |       | 1065  |       |
| 1872  |       | 1028  | 1176  | 3208  | 7803   | 9673  | 4635  | 3400  |
| 2455  |       |       |       |       |        | 5715  |       |       |
|       |       |       |       |       | 3815   | 5406  |       |       |
|       |       |       |       |       |        |       |       |       |
|       |       |       |       |       | 5232   | 3711  |       |       |
| 3877  |       | 2782  |       |       | 6714   | 8068  | 4009  |       |
| 2144  |       |       |       | 1724  | 3022   | 4459  | 2464  | 2106  |
| 4467  |       |       |       |       | 12266  | 12876 | 7103  | 7121  |



|       |       |       |       |       |        |        |        |       |
|-------|-------|-------|-------|-------|--------|--------|--------|-------|
|       | 1229  |       |       |       | 3558   | 3790   |        |       |
|       |       |       |       |       | 3679   | 5343   | 2308   | 2273  |
|       |       |       |       | 1833  | 3782   | 5364   | 4536   | 2377  |
|       |       |       |       |       | 1870   |        |        |       |
|       |       |       |       |       | 2266   | 3089   | 2107   | 1306  |
|       |       |       |       |       | 3347   | 6380   | 1982   |       |
| 5391  | 3107  | 3206  | 2842  | 4440  | 10269  | 13759  | 6204   | 5545  |
|       |       |       |       |       | 1095   | 1851   |        |       |
|       |       |       |       |       | 3269   | 3176   | 2779   | 2991  |
|       |       |       |       |       | 1778   | 3379   | 1785   | 2244  |
|       |       |       |       |       | 6444   | 9661   |        |       |
|       |       |       |       |       | 1856   | 2080   |        |       |
| 64172 | 37558 | 44379 | 41078 | 57571 | 136860 | 235434 | 111768 | 90622 |
|       |       |       |       |       | 1422   |        |        |       |
|       |       |       |       |       | 1587   | 2486   | 1552   |       |
| 64724 | 33745 | 46936 | 43248 | 67777 | 8909   | 25752  | 113795 | 97522 |
|       |       |       |       |       | 4607   | 8277   | 3476   | 3615  |
|       |       |       |       |       | 1578   | 1850   | 1504   |       |
|       |       |       |       |       | 1728   | 2792   |        |       |
|       |       |       |       |       | 1482   | 1241   |        |       |
|       |       |       |       |       | 2726   | 3350   |        |       |
|       |       |       |       |       |        | 2272   |        |       |
|       |       |       |       |       | 1411   | 2386   | 1061   |       |
|       | 1140  |       |       |       | 4660   | 6604   |        | 2679  |
|       |       |       |       |       | 1846   | 2196   |        |       |
|       |       |       |       |       |        | 2992   |        |       |
|       |       |       |       |       | 976    | 2461   | 1232   |       |
| 2055  |       |       |       | 1789  | 4559   | 7181   | 3246   | 2137  |

| P24<br>AAP | P27<br>AAP |
|------------|------------|
| 2898       |            |
| 2626       | 5397       |
|            | 18440      |
| 7652       |            |
| 5380       | 5573       |
| 3690       |            |
| 6918       | 8315       |
| 8039       | 6548       |
|            | 18293      |
| 7534       | 2670       |
| 3661       | 5445       |
| 6406       |            |
|            | 4880       |
| 2425       | 3227       |
| 5553       |            |
| 3558       |            |
| 6912       | 7714       |
| 3026       | 8805       |
|            | 1331       |
| 9261       | 8987       |
|            | 2497       |
| 1417       |            |
| 6565       |            |
| 4783       | 2996       |
| 8548       | 9392       |
|            | 1914       |
| 2891       |            |
| 179239     | 165638     |
| 5480       |            |
| 8582       | 10694      |
| 3887       |            |

3913

|       |      |
|-------|------|
| 17782 | 9129 |
| 4753  | 4374 |

|      |      |
|------|------|
| 3781 | 2936 |
| 9009 |      |

|       |       |
|-------|-------|
|       | 9105  |
| 30600 | 45012 |
| 3368  | 9112  |

|      |       |
|------|-------|
| 6439 | 6598  |
|      | 11508 |

|       |       |
|-------|-------|
|       | 4504  |
| 27938 | 16104 |
| 12151 | 9286  |
| 15099 |       |
| 5468  | 4403  |
| 3201  |       |
| 2351  |       |

|       |      |
|-------|------|
|       | 1919 |
| 4557  |      |
| 7189  |      |
| 3952  | 2157 |
| 13075 | 6751 |

|      |      |
|------|------|
| 8193 | 4347 |
|      | 5242 |

|      |      |
|------|------|
|      | 4403 |
| 3838 | 4894 |
| 4426 | 2947 |

|      |      |
|------|------|
| 8307 | 4096 |
|------|------|

4098

|      |      |
|------|------|
| 3320 |      |
| 5724 | 4464 |
| 2763 | 1752 |
| 9358 | 5581 |

3270  
1950  
3249

7042      6107

6281

91810      74585

5611      85386  
3152      2189  
            1458

952  
1371

3141

825  
3733      2025
