# Supplementary material for: Unraveling the Metabolic Changes in Acute Pancreatitis: A Metabolomics-Based Approach for Etiological Differentiation and Acute Biomarker Discovery
Source: MDPI journal article supplement (doi:10.3390/biom13101558), 2023-10-22
Supplement: s1 [file s1]

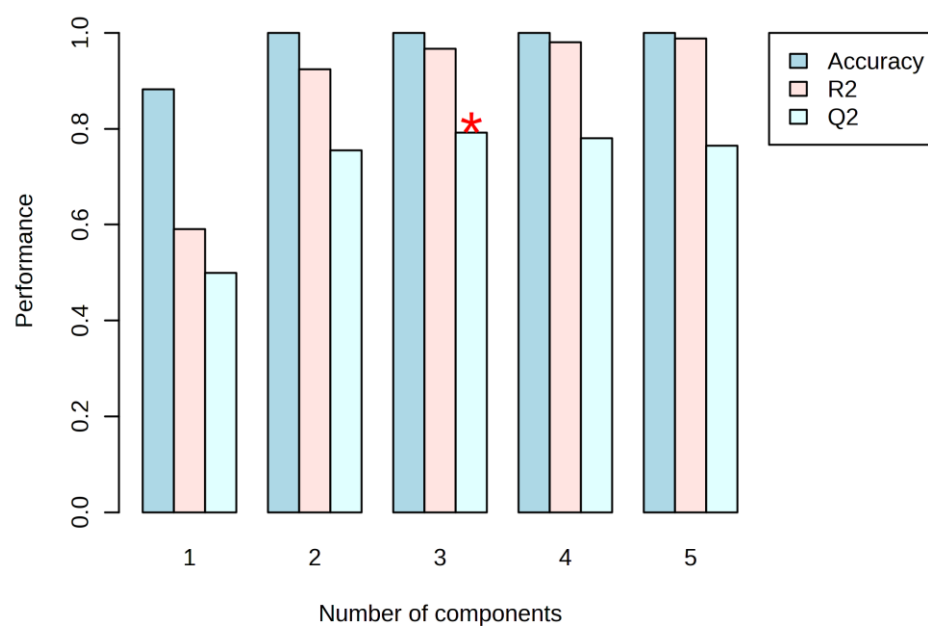

**Figure S1.** Cross-validation graph, according to PLS-DA analysis.

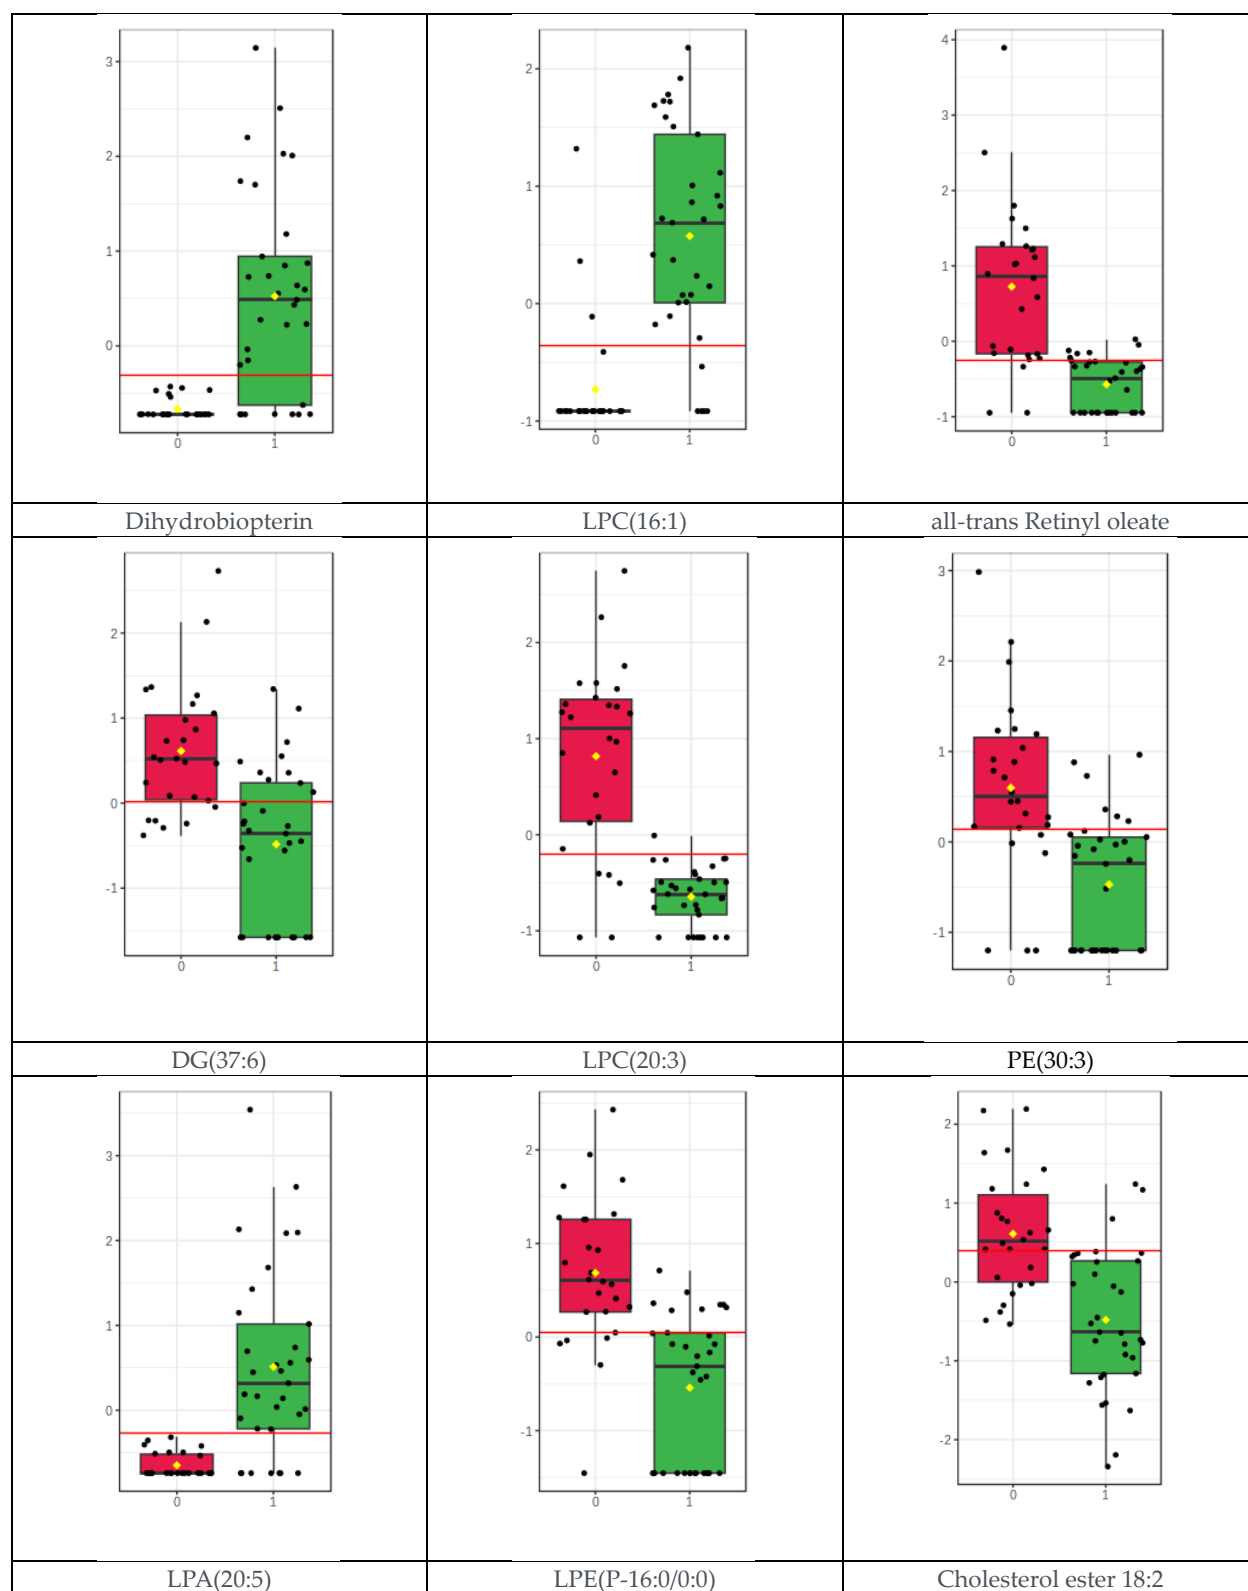

**Figure S2.** Representation of the variation in peak intensity for the first 9 molecules from groups C and P, which were selected by biomarker analysis, having AUROC values over 0.8.

**Table S1.** Identification of 69 molecules based on the parental ion value (m/z) and the Pubchem codes of each molecule ( <https://pubchem.ncbi.nlm.nih.gov/>; accessed on 22 March 2021).

| m/z      | Identification                                                  | Pubchem Code |
|----------|-----------------------------------------------------------------|--------------|
| 185.1073 | Phosphorylcholine                                               | 1014         |
| 203.0441 | Spermine                                                        | 1103         |
| 239.1652 | Tyrosylglycine                                                  | 29105        |
| 240.0977 | Dihydrobiopterin                                                | 119055       |
| 245.0696 | N-acetyl spermine                                               | 916          |
| 249.1503 | Sterol                                                          | 60512        |
| 268.0919 | beta-Neuraminic acid                                            | 513472       |
| 301.1313 | (S)-3-hydroxystearic acid                                       | 54199934     |
| 341.2894 | 9-Hexadecenoylcholine                                           | 22155839     |
| 353.2567 | Prostaglandin E2                                                | 5283116      |
| 359.3060 | MG(0:0/18:0/0:0)                                                | 79075        |
| 383.1485 | LPA(14:0)                                                       | 71296162     |
| 387.2386 | MG(20:0)                                                        | 3246944      |
| 391.1525 | Homolithocholic acid                                            | 15739299     |
| 397.2852 | Vitamin D2                                                      | 900          |
| 419.1513 | 1,25-dihydroxy-3-thiavitamin D3                                 | 9547302      |
| 419.2660 | 7 $\alpha$ ,25-dihydroxycholesterol                             | 11954197     |
| 423.2349 | C18:1 glycerol-3-phosphate                                      | 52929771     |
| 432.7781 | N-stearoyl phenylalanine                                        | 6710071      |
| 438.3683 | LPE(P-16:0/0:0)                                                 | 42607469     |
| 443.3225 | Ascorbyl stearate                                               | 54725318     |
| 453.3310 | Lauryl stearate                                                 | 79186        |
| 456.3388 | Arachidyl carnitine                                             | 6460         |
| 457.2116 | LPA(20:5)                                                       | 52929765     |
| 475.3127 | Myristyl linolenate                                             | 56935934     |
| 482.3930 | LPC(O-16:0)                                                     | 162126       |
| 487.3476 | 1 $\alpha$ ,25-Dihydroxypentyl<br>cholecalciferol               | 9547624      |
| 493.2920 | 1 $\alpha$ ,25-dihydroxy-11 $\alpha$ -<br>phenylcholecalciferol | 9547632      |
| 494.2988 | LPC(16:1)                                                       | 24779461     |
| 502.3515 | LPE(20:4)                                                       | 53480936     |
| 513.1999 | LPG(18:0)                                                       | 42607484     |
| 518.3038 | LPC 18:3                                                        | 24779469     |
| 520.3266 | LPC 18:2                                                        | 11005824     |

|          |                                  |           |
|----------|----------------------------------|-----------|
| 526.4191 | Cer(d18:0/15:0)                  | 52931114  |
| 531.3729 | Stearyl linolenate               | 6436477   |
| 537.2816 | Stearyl stearate                 | 17720     |
| 539.2975 | PG(20:1/0:0)                     | 52927446  |
| 542.3086 | LPC(20:5)                        | 11757087  |
| 544.3266 | LPC (20:4)                       | 53480469  |
| 546.3747 | LPC(20:3)                        | 53480467  |
| 546.4428 | LPC(18:0/0:0)                    | 497299    |
| 551.3141 | all-trans Retinyl oleate         | 11699609  |
| 551.3483 | <i>All trans</i> retinyl oleate  | 11699609  |
| 566.3146 | PC(18:0/2:0)                     | 135340    |
| 570.4221 | DG(16:1/0:0/16:1) (d5)           | 9543982   |
| 575.3987 | DG(13:0/20:4(5Z,8Z,11Z,14Z)/0:0) | 56936335  |
| 579.2820 | PA(O-16:0/12:0)                  | 52929565  |
| 595.2545 | LPI(18:3/0:0)                    | 52928611  |
| 595.3682 | DG(18:1/16:0/0:0)                | 5283471   |
| 606.319  | LPC(24:1)                        | 10406     |
| 611.2220 | PG(12:0/12:0)                    | 24779549  |
| 614.4691 | Cer(t18:0/19:0(2OH))             | 91820041  |
| 617.2373 | DG(36:4)                         | 07248     |
| 627.4187 | DG(37:6)                         | 9543769   |
| 634.4373 | LPC(26:1)                        | 29220     |
| 649.4001 | Cholesterol ester 18:2           | 5287939   |
| 650.3474 | PC(26:0)                         | 24778800  |
| 658.4962 | PE(30:3)                         | 9543978   |
| 663.4496 | DG(40:7)                         | 9543882   |
| 665.4367 | DG(40:9)                         | 9543872   |
| 679.4958 | 20:1 Cholesterol ester           | 16061337  |
| 717.4508 | PG(32:3)                         | 52926633  |
| 746.5462 | PC(P-18:0/16:0)                  | 53480705  |
| 763.4447 | PG(O-18:0/18:1)                  | 52927275  |
| 793.3259 | PG(38:7)                         | 52926625  |
| 798.5320 | PC(P-18:0/20:2)                  | 53480711  |
| 809.3022 | PI(16:0/16:1)                    | 52928334  |
| 815.3178 | TG (49:3)                        | 131759279 |
| 927.6434 | TG(57:3)                         | 56937912  |
